# Supplementary material for: From Complex Interventions to Complex Systems: Using Social Network Analysis to Understand School Engagement with Health and Wellbeing
Source: PubMed Central journal article supplement (PMC6571883; doi:10.3390/ijerph16101694), 2019-05-14
Supplement: ijerph-16-01694-s001.pdf [file ijerph-16-01694-s001.pdf]

Table S1. Job role key for Highbridge School net-maps

| <b>Node number</b> | <b>Job role</b>                    | <b>Node number</b> | <b>Job role</b>              |
|--------------------|------------------------------------|--------------------|------------------------------|
| <b>1</b>           | Chair of governors                 | <b>14</b>          | School nurse                 |
| <b>2</b>           | Safeguarding officer               | <b>15</b>          | Teaching assistants          |
| <b>3</b>           | Head teacher                       | <b>16</b>          | All students                 |
| <b>4</b>           | Deputy head teacher                | <b>17</b>          | All parents                  |
| <b>5</b>           | Healthy Schools Coordinator        | <b>18</b>          | Promoting inclusion officer  |
| <b>6</b>           | All staff (daily meeting)          | <b>19</b>          | Women's aid                  |
| <b>7</b>           | All staff (bulletin)               | <b>20</b>          | SANDS (drug/alcohol misuse)  |
| <b>8</b>           | Healthy living team (multi-agency) | <b>21</b>          | YAS clinic (sexual health)   |
| <b>9</b>           | Wellbeing manager                  | <b>22</b>          | NHS (many services)          |
| <b>10</b>          | Communities first staff            | <b>23</b>          | Team Around the Family (TAF) |
| <b>11</b>          | Technicians (Science/Food/Art)     | <b>24</b>          | Social services              |
| <b>12</b>          | Local doctor's surgery             | <b>25</b>          | Youth service                |
| <b>13</b>          | Youth workers                      |                    |                              |

Table S2. Job role key for Oakwood School net-maps

| <b>Node number</b> | <b>Job Role</b>                       | <b>Node number</b> | <b>Job Role</b>                                    |
|--------------------|---------------------------------------|--------------------|----------------------------------------------------|
| <b>1</b>           | Head teacher                          | <b>17</b>          | Parents                                            |
| <b>2</b>           | Deputy head                           | <b>18</b>          | Fire service                                       |
| <b>3</b>           | Assistant head 1                      | <b>19</b>          | Barnardos                                          |
| <b>4</b>           | Assistant head 2                      | <b>20</b>          | Women's aid                                        |
| <b>5</b>           | Assistant head 3                      | <b>21</b>          | Drug/alcohol agencies                              |
| <b>6</b>           | Office manager                        | <b>22</b>          | Counsellor                                         |
| <b>7</b>           | All teaching staff                    | <b>23</b>          | Young carers                                       |
| <b>8</b>           | Head of PSE                           | <b>24</b>          | Educational welfare officer                        |
| <b>9</b>           | Additional learning needs coordinator | <b>25</b>          | Youth offending team                               |
| <b>10</b>          | Heads of year                         | <b>26</b>          | School health nurse                                |
| <b>11</b>          | School nurse                          | <b>27</b>          | Looked after children team                         |
| <b>12</b>          | Non-teaching staff x35                | <b>28</b>          | Police                                             |
| <b>13</b>          | Speech/language support officer       | <b>29</b>          | Inclusion service                                  |
| <b>14</b>          | Emotional literacy support assistant  | <b>30</b>          | Educational psychologist                           |
| <b>15</b>          | School counsellor                     | <b>31</b>          | Child and Adolescent Mental Health Service (CAMHS) |
| <b>16</b>          | Students                              | <b>32</b>          | Social services                                    |

Table S3. Job role key for Woodlands School net-map

| <b>Node number</b> | <b>Job Role</b>               | <b>Node number</b> | <b>Job Role</b>                                     |
|--------------------|-------------------------------|--------------------|-----------------------------------------------------|
| <b>1</b>           | Head teacher                  | <b>17</b>          | Canteen staff (x14)                                 |
| <b>2</b>           | Assistant head 1              | <b>18</b>          | Dining room assistants                              |
| <b>3</b>           | Assistant head 2              | <b>19</b>          | Learning support assistants                         |
| <b>4</b>           | Assistant head 3              | <b>20</b>          | School council members                              |
| <b>5</b>           | Assistant head 4              | <b>21</b>          | All parents                                         |
| <b>6</b>           | Deputy head 1                 | <b>22</b>          | All year groups                                     |
| <b>7</b>           | Deputy head 2                 | <b>23</b>          | Governing body                                      |
| <b>8</b>           | Heads of year (x5)            | <b>24</b>          | School nurses (x2)                                  |
| <b>9</b>           | Science teacher/student voice | <b>25</b>          | Drug aid                                            |
| <b>10</b>          | Food technology teacher       | <b>26</b>          | Social services                                     |
| <b>11</b>          | Girls' PE teacher             | <b>27</b>          | Child and Adolescent Mental Health Services (CAMHS) |
| <b>12</b>          | PE head of department         | <b>28</b>          | Mind (mental health charity)                        |
| <b>13</b>          | PE teacher                    | <b>29</b>          | Shelter Cymru                                       |
| <b>14</b>          | Office staff (x6)             | <b>30</b>          | Safer Area                                          |
| <b>15</b>          | Caretakers                    | <b>31</b>          | Healthy Schools Coordinator                         |
| <b>16</b>          | Cleaners                      |                    |                                                     |

Table S4. Job role key for Greenfield School net-map

| <b>Node number</b> | <b>Job role</b>                             | <b>Node number</b> | <b>Job role</b>                           |
|--------------------|---------------------------------------------|--------------------|-------------------------------------------|
| <b>1</b>           | Assistant head (Wellbeing and Safeguarding) | <b>11</b>          | Learning and wellbeing department manager |
| <b>2</b>           | Assistant head (PSE)                        | <b>12</b>          | Learning support assistant (LSA)          |
| <b>3</b>           | Head of student support                     | <b>13</b>          | Student support team (LSAs)               |
| <b>4</b>           | Head of PE                                  | <b>14</b>          | Canteen manager                           |
| <b>5</b>           | PE teacher                                  | <b>15</b>          | Parent forum                              |
| <b>6</b>           | Head of food technology                     | <b>16</b>          | Anti-bullying team                        |
| <b>7</b>           | Head of science                             | <b>17</b>          | Wellbeing committee                       |
| <b>8</b>           | Head of religious education                 | <b>18</b>          | Transition key worker                     |
| <b>9</b>           | Science teacher                             | <b>19</b>          | Link governor                             |
| <b>10</b>          | Parent/student support                      | <b>20</b>          | Healthy Schools Coordinator               |
